# Supplementary material
Source: PubMed Central journal article supplement (PMC3864014)
Supplement: NIHMS512592-supplement-1.pdf [file NIHMS512592-supplement-1.pdf]

## SUPPLEMENTAL MATERIAL

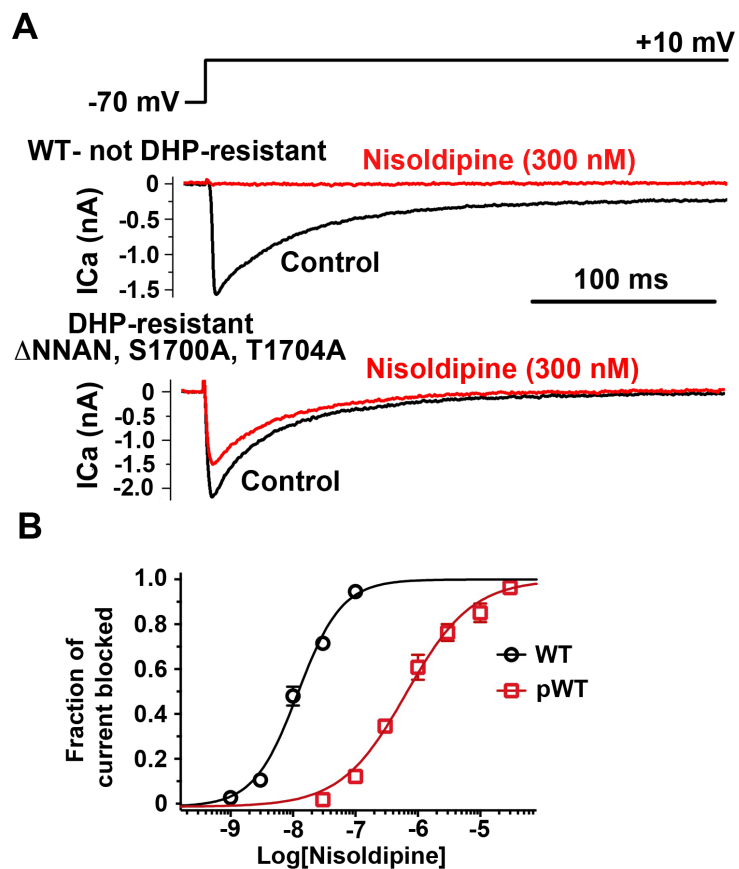

**Online Figure I. DHP-resistant currents in tsA-201 cells.** (A) Exemplar whole cell current traces recorded from -70 mV to +10 mV before and after 300 nM nisoldipine. (B) Semi-log plot of dose-response relationship of nisoldipine and fraction of current blocked.  $IC_{50}$  = 12 nM for WT; 650 nM for DHP-resistant, pWT  $\alpha_{1C}$ . N = 11 for WT and N = 12 for DHP-resistant, pWT  $\alpha_{1C}$ . Mean  $\pm$  SEM.

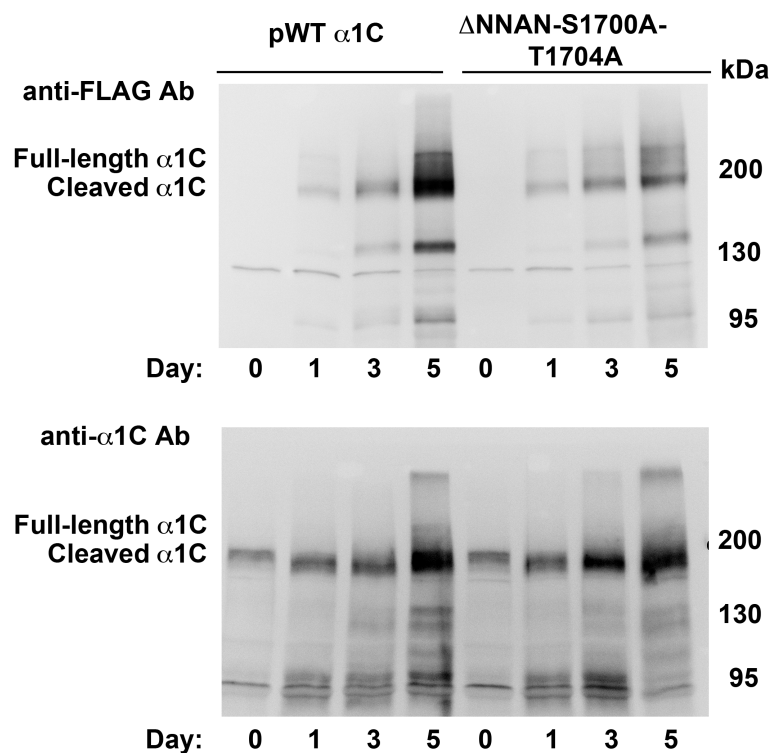

**Online Figure II. Inducible, cardiac-specific FLAG-tagged  $\alpha_{1C}$ -expressing transgenic mice.** Anti-FLAG antibody (upper) and anti- $\alpha_{1C}$  antibody (lower) immunoblots showing FLAG-epitope tagged  $\alpha_{1C}$  expression in tsA-201 cells transfected with FLAG-tagged  $\alpha_{1C}$  and expression in isolated cardiomyocytes from either pWT  $\alpha_{1C}$  or  $\Delta$ NAN-S1700A-T1704A transgenic mice before doxycycline and after doxycycline-impregnated food for 1, 3 and 5 days.

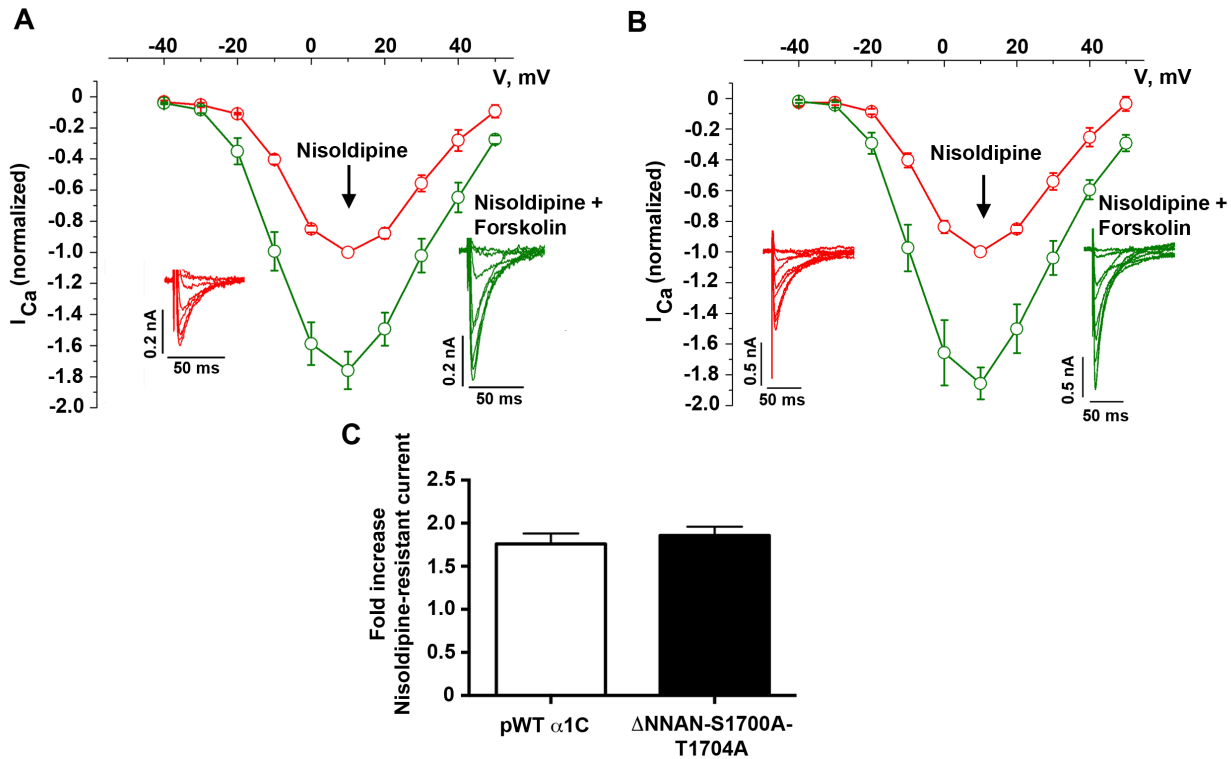

**Online Figure III. Forskolin-induced stimulation of transgenic  $Ca_V1.2$  currents.** (A-B) Current-voltage relationships of pWT  $\alpha_{1C}$  (A) and  $\Delta$ NAN-S1700A-T1704A  $Ca_V1.2$  (B) acquired in 300 nM nisoldipine, before (red traces) and 3 minutes after superfusion of 10  $\mu$ M forskolin (green traces). Insets: Series of whole-cell  $Ca_V1.2$  currents recorded from a series of pulses between -40 mV and + 50 mV from a holding potential of -70 mV before (red traces) and 3 minutes after forskolin (green traces). (C) Bar graph depicting the forskolin-induced fold-increase in peak current. Mean + SEM. P= not significant by Student's t-test.

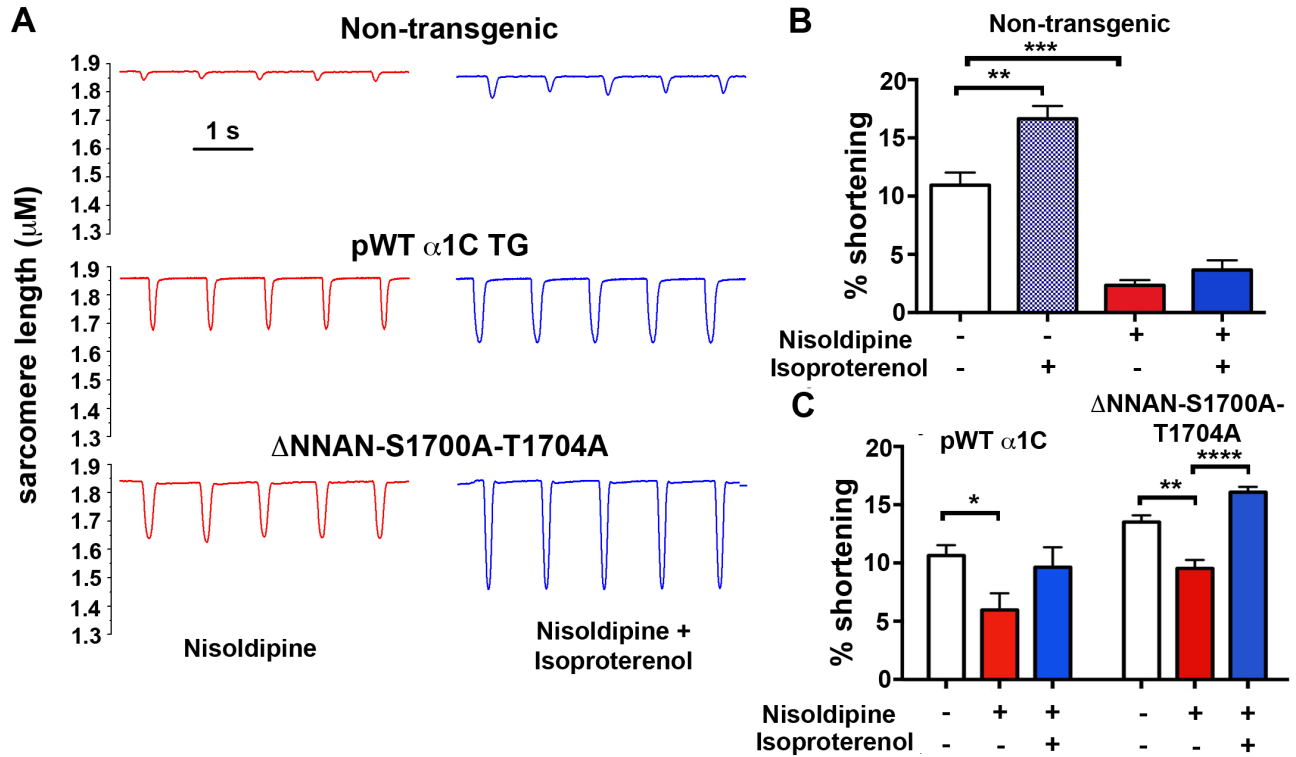

**Online Figure IV. Effect of isoproterenol on fractional shortening in non-transgenic mice and**

**doxycycline-fed transgenic mice.** (A) Changes in sarcomere length in response to field stimulation at 1-Hz.

Cardiomyocytes were incubated for at least 2 minutes with 300 nM nisoldipine-containing solution (red traces).

Isoproterenol (200 nM) was then superfused with 300 nM nisoldipine (blue traces). Sarcomere length was

determined after 3 minutes. (B-C) Bar graphs of % shortening in absence and presence of nisoldipine and

isoproterenol. Mean  $\pm$  SEM. N= 14 cardiomyocytes for all conditions. One-way Anova with Sidak post hoc

test. \* P<0.05, \*\* P<0.01, \*\*\*\* P<0.0001

## DETAILED METHODS:

### Extent of non-transgenic current in fraction of nisoldipine-resistant current

The fraction of nisoldipine-resistant current is

$$R = I_{\text{Nis}} / I_{\text{Tot}} \quad (1)$$

where  $I_{\text{Tot}}$  is the total peak current at +10 mV before nisoldipine, and  $I_{\text{Nis}}$  is the peak current at +10 mV in the presence of 300 nM nisoldipine.

The nisoldipine-resistant current at +10 mV is

$$I_{\text{Nis}} = I_{\text{Tot}} * X * m + I_{\text{Tot}} * (1-X) * n \quad (2)$$

where  $X$  is the fraction of endogenous current of total current,  $m$  is the fraction of current remaining in non-transgenic cardiomyocytes in the presence of 300 nM nisoldipine, and  $n$  is the fraction of remaining current of DHP-resistant transgenic channels in the presence of 300 nM nisoldipine (assessed in tsA-201).

Dividing Eq. 2 by  $I_{\text{Tot}}$  and substituting Eq. 1  $R$  in Eq. 2, we obtain

$$R = X * m + (1-X) * n \quad (3)$$

Solving for  $X$ :

$$X = (R - n) / (m - n) \quad (4)$$

In our experiments,  $m = 0.07$  (see Fig. 3),  $n = 0.66$ . Therefore, when  $R = 0.4$ ,  $X = 0.44$  and when  $R = 0.3$ ,  $X = 0.61$ .

In the presence of nisoldipine, the fraction of non-transgenic (NTG) current of the total current is:

$$\text{Fraction}_{\text{NTG}} = (X * 0.07) / ((1-X) * 0.66) + (X * 0.07) \quad (5)$$

For  $R = 0.4$ :  $\text{Fraction}_{\text{NTG}} = 0.08$

For  $R = 0.3$ :  $\text{Fraction}_{\text{NTG}} = 0.14$
